# Supplementary material for: CD133/Prom1 marks proximal mouse oviduct epithelial progenitors and adult epithelial cells with a low generative capacity
Source: PubMed Central journal article supplement (PMC10508696; doi:10.1242/bio.059963), 2023-09-13
Supplement: biolopen-12-059963-s1.pdf [file biolopen-12-059963-s1.pdf]

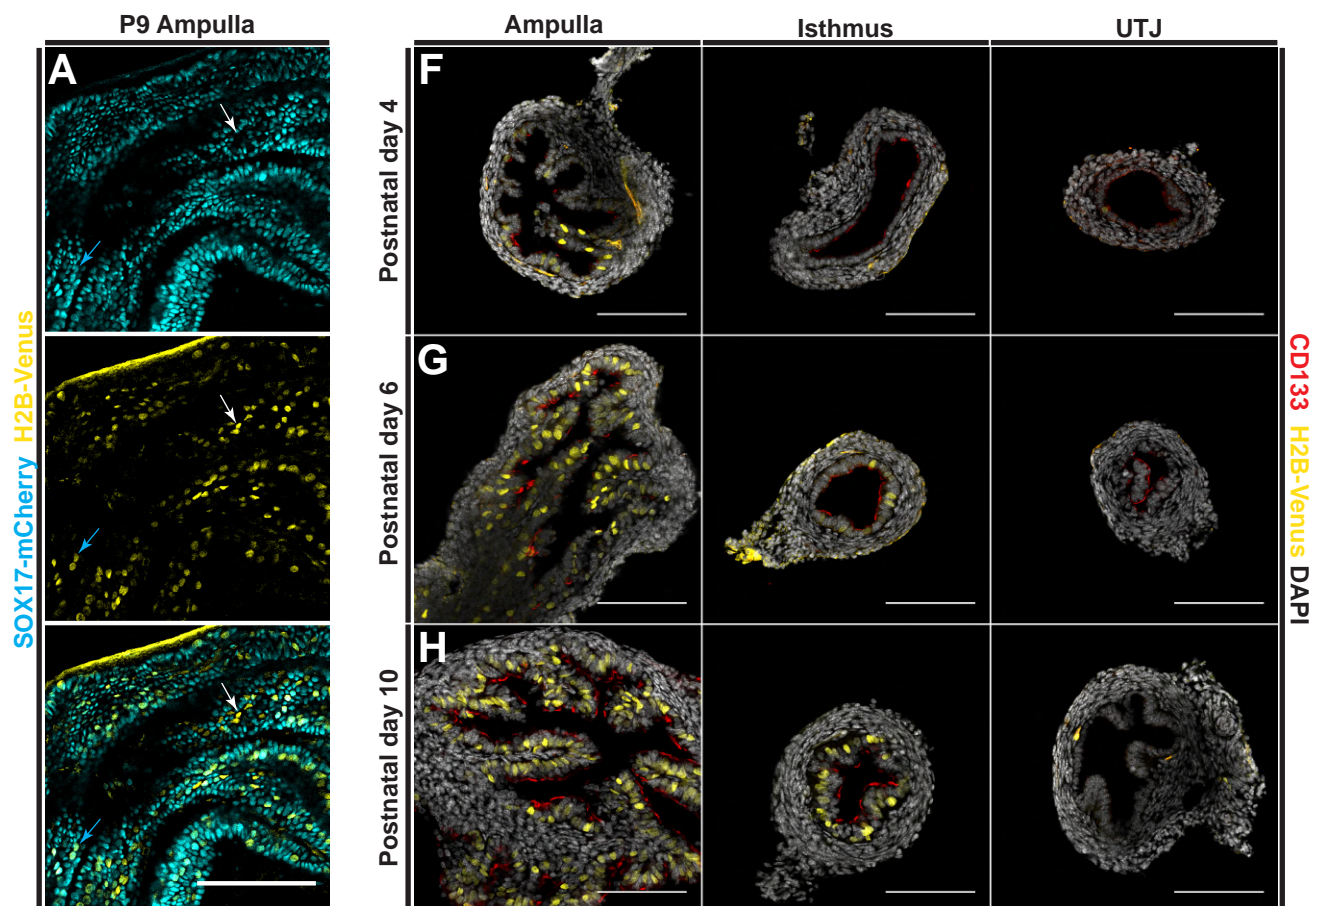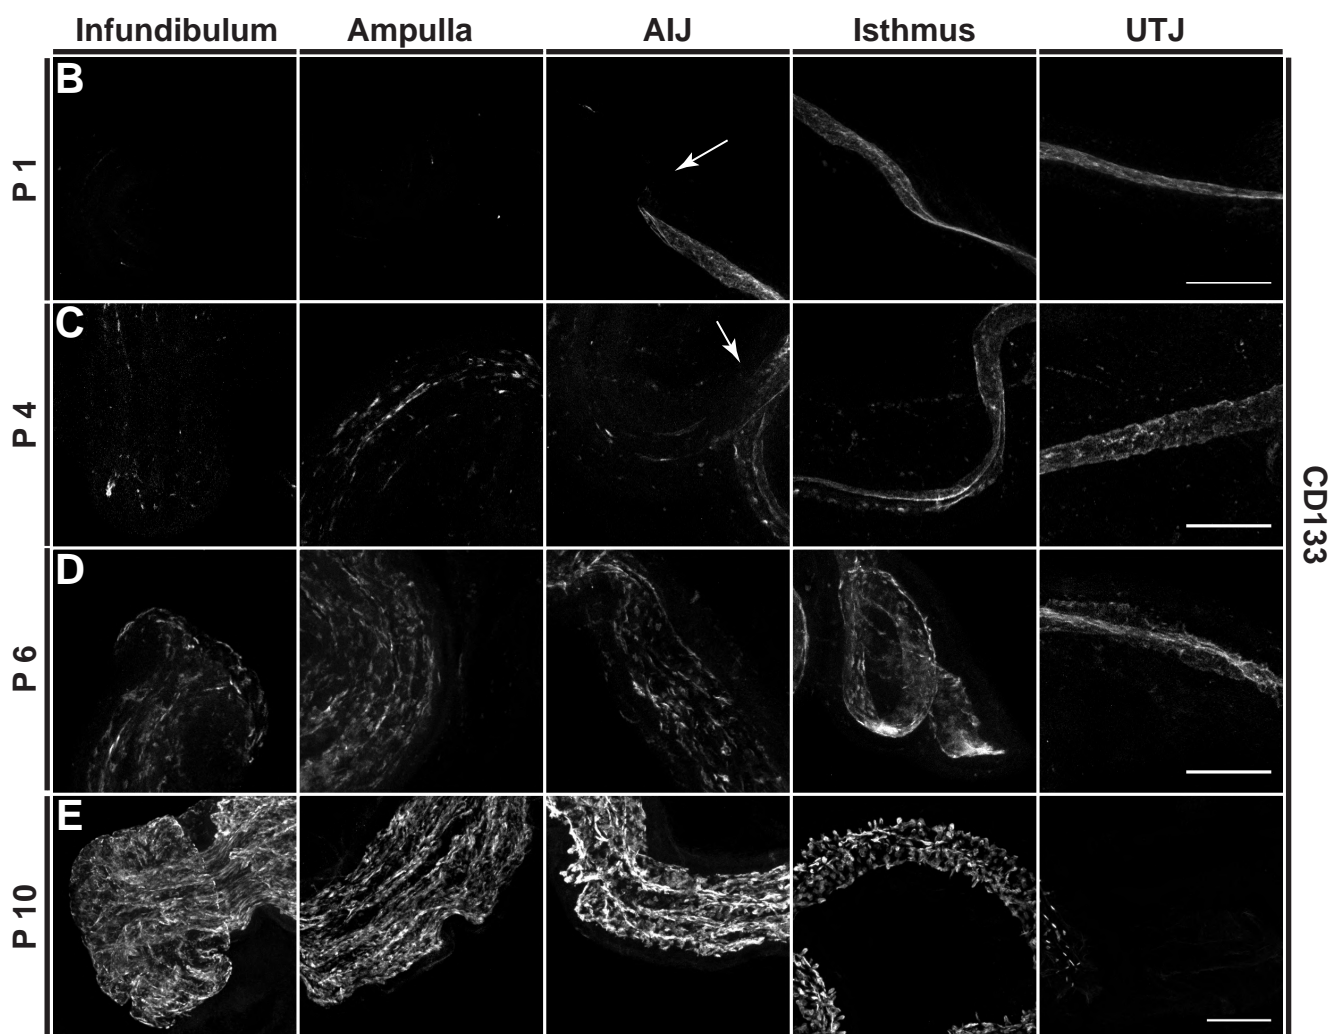

Fig. S1.

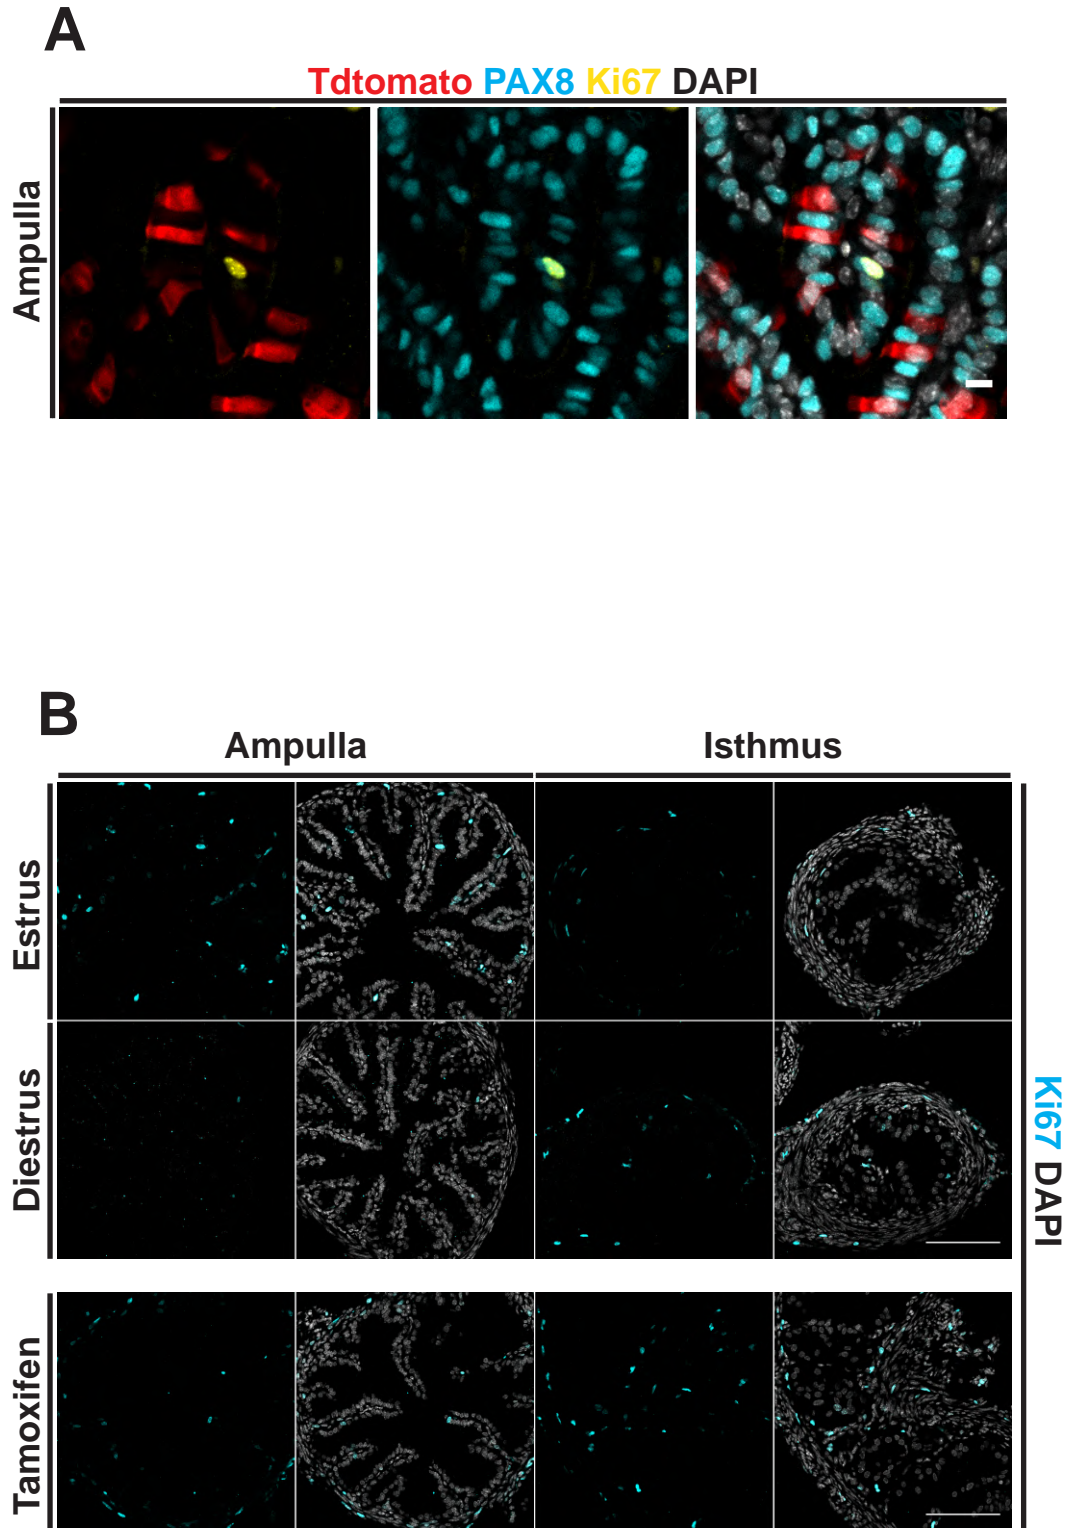

Fig. S2.
